# Managing arrhythmias: diagnosis and modern treatment

Thomas F. Lüscher, MD, FESC

Editor-in-Chief, Zurich Heart House, Careum Campus, Moussonstrasse 4, 8091 Zurich, Switzerland

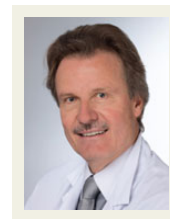

Arrhythmias are one of the most common symptoms of heart disease and are associated with considerable morbidity such as stroke,<sup>1</sup> and mortality.<sup>2</sup> Fortunately, with the introduction of ablation techniques and device therapy,<sup>3</sup> their management has considerably improved over the last two decades and again more recently. Thus, the **'The year in cardiology 2015: arrhythmias and device therapy'** by Gerhard Hindricks from the University of Leipzig in Germany<sup>4</sup> is a timely review of the most important and clinically relevant recent developments in arrhythmias and invasive electrophysiology, and new devices in particular.

Ventricular tachycardias are the most feared arrhythmias. Hugh Calkins from the John Hopkins Hospital in Baltimore, USA discusses in more depth **'The role of catheter ablation in the management of ventricular tachycardia'**.<sup>5</sup> As he points out, the treatment strategy for ventricular tachycardia must be guided by patient symptoms, the risk of sudden death, and the underlying cardiac structure. Over the last decades, catheter ablation has emerged as the primary treatment of idiopathic ventricular tachycardia and has become an important management strategy in reducing ventricular tachycardia burden in patients with structural heart disease and an implanted device.<sup>6</sup>

The most common arrhythmia is probably atrial fibrillation (AF), which increases in frequency with age<sup>7</sup> and particularly in those with hypertension<sup>8</sup> and/or heart failure.<sup>9</sup> Here too, catheter ablation has become a valuable treatment option.<sup>10,11</sup> However, a significant number of patients have recurrences after catheter ablation,<sup>12</sup> which could be due to irritability in the left atrium caused by the ablation procedure. In the FAST TRACK entitled **'Efficacy of Antiarrhythmic drugs Short-Term use after catheter ablation for Atrial Fibrillation (EAST-AF) trial'**,<sup>13</sup> Satoshi Shizuta and colleagues from the Kyoto University Graduate School of Medicine in Japan sought to evaluate whether 90 days use of an antiarrhythmic drug following AF ablation could reduce the incidence of early recurrence and thereby promote reverse remodelling of the left atrium, leading to improved long-term clinical outcomes. In the largest trial so far, a total of 2038 patients who had undergone radiofrequency catheter ablation for paroxysmal, persistent, or long-lasting AF were randomized to either 90 days use of Vaughan Williams class I or III antiarrhythmic drugs or not. The primary endpoint was recurrent atrial tachyarrhythmias lasting for >30 s or those requiring repeat ablation, hospital admission, or

usage of a class I or III antiarrhythmic drug at 1 year. At 90 days, patients on antiarrhythmic drugs had significantly less recurrent atrial tachyarrhythmias compared with controls, with a hazard ratio of 0.84, but not at 1 year. The authors conclude that short-term use of an antiarrhythmic drug for 90 days following ablation of AF reduced recurrent atrial tachyarrhythmias during the treatment period, but it did not improve clinical outcomes later on. The manuscript is accompanied by an **Editorial** by Luis R. Scott from the Mayo Clinic in Arizona, USA.<sup>14</sup>

Congenital heart defects affect ~1% of newborn children.<sup>15</sup> Today, most of them undergo corrective or palliative surgery and can survive into adulthood,<sup>16</sup> also thanks to improved long-term care.<sup>17</sup> However, they are prone to arrhythmias and sudden death. The fear of sudden death has led to restrictions of physical activity and competitive sports. In their paper, **'Sudden unexpected death in children with congenital heart defects'**, Jarle Jortveit and colleagues from the Sørlandet Hospital Arendal in Norway<sup>18</sup> investigated whether the rate of sudden deaths in children with congenital heart defects was related to cardiac disease, co-morbidities, and/or physical activity. To that end, they analysed data of 943 871 live births in Norway from 1994 to 2009. Among 11 272 children with congenital heart defects, they identified 19 or 0.2% who experienced sudden deaths. A cardiac cause of death was identified in seven of these cases. None of the children died during physical activity, but two survived cardiac arrest during sports. The authors conclude that sudden death is infrequent in children with congenital heart defects who survived beyond 2 years of age. Co-morbidity was common among children who died; physical activity is rarely associated with sudden death, challenging certain recommendations for such patients. The manuscript is accompanied by a thought-provoking **Editorial** by Gerhard-Paul Diller from the University Hospital Münster in Germany.<sup>19</sup>

The ECG remains the most important tool in the diagnosis of arrhythmias. Until recently, the inferolateral early repolarization syndrome possibly included patients with Brugada-like ECG recorded only in the high intercostal spaces.<sup>20,21</sup> In their paper entitled **'Significance of electrocardiogram recording in high intercostal spaces in patients with early repolarization syndrome'**,<sup>22</sup> Shiro Kamakura and colleagues from the National Cerebral and Cardiovascular Center investigated ECG recordings

in the second to fourth intercostal spaces in 56 patients with early repolarization syndrome and spontaneous ventricular fibrillation not linked to structural heart disease. They underwent drug provocation by sodium channel blockade. Eighteen patients with type 1 Brugada-like ECG were excluded. Thirty-eight patients were classified into four groups: (A) those with early repolarization and type 1 Brugada-like ECG only in high intercostal spaces; (B) those with early repolarization syndrome with non-type 1 Brugada-like ECG only in high intercostal spaces; (C) those with early repolarization syndrome with non-type 1 Brugada-like ECG in the standard ECG; and (D) those with early repolarization syndrome only, spontaneously or after drug testing. During almost 10 years of follow-up, the rate of ventricular fibrillation including electrical storm was significantly higher in groups A (67%), B (80%), and C (50%) than in group D (11%). Thus, in about a third of patients with early repolarization syndrome who showed a Brugada-like ECG in the high intercostal spaces, ventricular fibrillation recurred, specifically in those with Brugada-like ECG in any pre-cordial lead including high intercostal spaces. Such patients comprised about half of the entire early repolarization cohort. The manuscript is accompanied by an interesting **Editorial** by Josep Brugada from the Hospital Clinic of Barcelona in Spain.<sup>23</sup>

An important risk factor of ventricular arrhythmias is a long<sup>24</sup> or short QT-interval<sup>25</sup> in the ECG. In their basic science paper entitled '**Oestradiol regulates human QT-interval: acceleration of cardiac repolarization by enhanced KCNH2 membrane trafficking**', Lars Anneken from the Universitätsklinikum Erlangen in Germany assessed the relationship between QTc duration and gonadal hormones as well as the underlying mechanisms.<sup>26</sup> They measured hormone levels and QTc intervals in women during clomiphene stimulation for infertility and those before, during, and after pregnancy. Three heterozygous LQT-2 patients with the KCNH2-p.Arg752Pro missense mutation and unaffected family members were studied during their menstrual cycles. High oestradiol levels, but neither progesterone nor the oestradiol/progesterone ratio, inversely correlated with QTc. Consistent with clinical data, *in vitro* oestradiol stimulation enhanced IKCNH2 via oestradiol receptor- $\alpha$ -dependent promotion of KCNH2 channel trafficking. Of note, the heat shock protein 90 inhibitor geldanamycin abolished the oestradiol-induced increase in IKCNH2 currents, but had no effect on KCNH2 transcription, translation, or the expression of oestradiol receptors and chaperones. Oestradiol enhanced the physical interaction of KCNH2 channel subunits with heat shock proteins and augmented ion channel trafficking to the membrane. The authors conclude that elevated oestradiol levels were associated with shorter QTc intervals in healthy women and female LQT-2 patients. Oestradiol acts on KCNH2 channels via enhanced oestradiol receptor- $\alpha$ -mediated heat shock protein 90 interaction, augments membrane trafficking, and thereby increases repolarizing current. These results provide mechanistic insights into hormonal control of human ventricular repolarization and open up novel therapeutic avenues, as critically discussed in an **Editorial** by Katja E. Odening from the Heart Center University of Freiburg, Germany.<sup>27</sup>

The editors hope that this issue of the *European Heart Journal* will be of interest to its readers.

## References

- Lip GY. Stroke and bleeding risk assessment in atrial fibrillation: when, how, and why? *Eur Heart J* 2013;**34**:1041–1049.
- Priori SG, Blomstrom-Lundqvist C, Mazzanti A, Blom N, Borggrefe M, Camm J, Elliott PM, Fitzsimons D, Hatala R, Hindricks G, Kirchhof P, Kjeldsen K, Kuck KH, Hernandez-Madrid A, Nikolaou N, Norekvål TM, Spaulding C, Van Veldhuisen DJ; Authors/Task Force Members; Document Reviewers. 2015 ESC Guidelines for the management of patients with ventricular arrhythmias and the prevention of sudden cardiac death: the Task Force for the Management of Patients with Ventricular Arrhythmias and the Prevention of Sudden Cardiac Death of the European Society of Cardiology (ESC). Endorsed by: Association for European Paediatric and Congenital Cardiology (AEPC). *Eur Heart J* 2015;**36**:2793–2867.
- Brignole M, Auricchio A, Baron-Esquivias G, Bordachar P, Boriani G, Breithardt OA, Cleland J, Deharo JC, Delgado V, Elliott PM, Gorenek B, Israel CW, Leclercq C, Linde C, Mont L, Padeletti L, Sutton R, Vardas PE; ESC Committee for Practice Guidelines (CPG), Zamorano JL, Achenbach S, Baumgartner H, Bax JJ, Bueno H, Dean V, Deaton C, Erol C, Fagard R, Ferrari R, Hasdai D, Hoes AW, Kirchhof P, Knuuti J, Kolh P, Lancellotti P, Linhart A, Nihoyannopoulos P, Piepoli MF, Ponikowski P, Sirnes PA, Tamargo JL, Tendra M, Torbicki A, Wijns W, Windecker S; Document Reviewers, Kirchhof P, Blomstrom-Lundqvist C, Badano LP, Aliyev F, Bānsdai D, Baumgartner H, Bsata W, Buser P, Charron P, Daubert JC, Dobreanu D, Faerestrands S, Hasdai D, Hoes AW, Le Heuzey JY, Mavrakis H, McDonagh T, Merino JL, Nawar MM, Nielsen JC, Pieske B, Poposka L, Ruschitzka F, Tendra M, Van Gelder IC, Wilson CM. 2013 ESC Guidelines on cardiac pacing and cardiac resynchronization therapy: the Task Force on cardiac pacing and resynchronization therapy of the European Society of Cardiology (ESC). Developed in collaboration with the European Heart Rhythm Association (EHRA). *Eur Heart J* 2013;**34**:2281–2329.
- Heidbuchel H, Hindricks G. The year in cardiology 2014: arrhythmias and device therapy. *Eur Heart J* 2015;**36**:270–278.
- Tanawuttivat T, Nazarian S, Calkins H. The role of catheter ablation in the management of ventricular tachycardia. *Eur Heart J* 2016;**37**:594–609.
- Maury P, Baratto F, Zeppenfeld K, Klein G, Delacretaz E, Sacher F, Pruvot E, Brigadeau F, Rollin A, Andronache M, Maccabelli G, Gawrysiak M, Brenner R, Forclaz A, Schlaepfer J, Lacroix D, Duparc A, Mondoly P, Bouisset F, Delay M, Hocini M, Derval N, Sadoul N, Magnin-Poull I, Klug D, Haïssaguerre M, Jais P, Della Bella P, De Chillou C. Radio-frequency ablation as primary management of well-tolerated sustained monomorphic ventricular tachycardia in patients with structural heart disease and left ventricular ejection fraction over 30%. *Eur Heart J* 2014;**35**:1479–1485.
- Pillarisetti J, Lakkireddy D. Atrial fibrillation in Europe: state of the state in disease management! *Eur Heart J* 2014;**35**:3326–3327.
- Marott SC, Nielsen SF, Benn M, Nordestgaard BG. Antihypertensive treatment and risk of atrial fibrillation: a nationwide study. *Eur Heart J* 2014;**35**:1205–1214.
- Kotecha D, Piccini JP. Atrial fibrillation in heart failure: what should we do? *Eur Heart J* 2015;**36**:3250–3257.
- Haegeli LM, Calkins H. Catheter ablation of atrial fibrillation: an update. *Eur Heart J* 2014;**35**:2454–2459.
- McLellan AJ, Ling LH, Azzopardi S, Lee GA, Lee G, Kumar S, Wong MC, Walters TE, Lee JM, Looi KL, Halloran K, Stiles MK, Lever NA, Fynn SP, Heck PM, Sanders P, Morton JB, Kalman JM, Kistler PM. A minimal or maximal ablation strategy to achieve pulmonary vein isolation for paroxysmal atrial fibrillation: a prospective multi-centre randomized controlled trial (the Minimax study). *Eur Heart J* 2015;**36**:1812–1821.
- Darkner S, Chen X, Hansen J, Pehrson S, Johannessen A, Nielsen JB, Svendsen JH. Recurrence of arrhythmia following short-term oral AMIOdaron after CATHeter ablation for atrial fibrillation: a double-blind, randomized, placebo-controlled study (AMIO-CAT trial). *Eur Heart J* 2014;**35**:3356–3364.
- Kaitani K, Inoue K, Kobori A, Nakazawa Y, Ozawa T, Kurotobi T, Morishima I, Miura F, Watanabe T, Masuda M, Naito M, Fujimoto H, Nishida T, Furukawa Y, Shirayama T, Tanaka M, Okajima K, Yao T, Egami Y, Satomi K, Noda T, Miyamoto K, Haruna T, Kawaji T, Yoshizawa T, Toyota T, Yahata M, Nakai K, Sugiyama H, Higashi Y, Ito M, Horie M, Kusano KF, Shimizu W, Kamakura S, Morimoto T, Kimura T, Shizuta S; EAST-AF Trial Investigators. Efficacy of Antiarrhythmic Drugs Short-Term Use After Catheter Ablation for Atrial Fibrillation (EAST-AF) trial. *Eur Heart J* 2016;**37**:610–618.
- Scott LR. Antiarrhythmic drugs after ablation for atrial fibrillation: the hope, the hype, and the reality. *Eur Heart J* 2016;**37**:619–620.
- Baumgartner H, Bonhoeffer P, De Groot NM, de Haan F, Deanfield JE, Galie N, Gatzoulis MA, Gohlke-Baerwolf C, Kaemmerer H, Kilner P, Meijboom F, Mulder BJ, Oechslin E, Oliver JM, Serraf A, Szatmari A, Thaulow E, Vouhe PR, Walma E; Task Force on the Management of Grown-up Congenital Heart Disease

- of the European Society of Cardiology (ESC); Association for European Paediatric Cardiology (AEPIC); ESC Committee for Practice Guidelines (CPG). ESC Guidelines for the management of grown-up congenital heart disease (new version 2010). *Eur Heart J* 2010;**31**:2915–2957.
16. Verheugt CL, Uiterwaal CS, van derVelde ET, Meijboom FJ, Pieper PG, van Dijk AP, Vliegen HW, Grobbee DE, Mulder BJ. Mortality in adult congenital heart disease. *Eur Heart J* 2010;**31**:1220–1229.
  17. Baumgartner H, Budts W, Chessa M, Deanfield J, Eicken A, Holm J, Iserin L, Meijboom F, Stein J, Szatmari A, Trindade PT, Walker F; Working Group on Grown-up Congenital Heart Disease of the European Society of Cardiology. Recommendations for organization of care for adults with congenital heart disease and for training in the subspecialty of 'Grown-up Congenital Heart Disease' in Europe: a position paper of the Working Group on Grown-up Congenital Heart Disease of the European Society of Cardiology. *Eur Heart J* 2014;**35**:686–690.
  18. Jortveit J, Eskedal L, Hirth A, Fomina T, Dohlen G, Hagemo P, Tell GS, Birkeland S, Øyen N, Holmstrøm H. Sudden unexpected death in children with congenital heart defects. *Eur Heart J* 2016;**37**:621–626.
  19. Diller G-P, Baumgartner H. Sudden cardiac death during exercise in patients with congenital heart disease: the exercise paradox and the challenge of appropriate counselling. *Eur Heart J* 2016;**37**:627–629.
  20. Veltmann C, Schimpf R, Echternach C, Eckardt L, Kuschyk J, Streitner F, Spehl S, Borggrefe M, Wolpert C. A prospective study on spontaneous fluctuations between diagnostic and non-diagnostic ECGs in Brugada syndrome: implications for correct phenotyping and risk stratification. *Eur Heart J* 2006;**27**:2544–2552.
  21. Richter S, Sarkozy A, Paparella G, Henkens S, Boussy T, Chierchia GB, Brugada R, Brugada J, Brugada P. Number of electrocardiogram leads displaying the diagnostic coved-type pattern in Brugada syndrome: a diagnostic consensus criterion to be revised. *Eur Heart J* 2010;**31**:1357–1364.
  22. Kamakura T, Wada M, Nakajima I, Ishibashi K, Miyamoto K, Okamura H, Noda T, Aiba T, Takaki H, Yasuda S, Ogawa H, Shimizu W, Makiyama T, Kimura T, Kamakura S, Kusano K. Significance of electrocardiogram recording in high intercostal spaces in patients with early repolarization syndrome. *Eur Heart J* 2016;**37**:630–637.
  23. Brugada J, Brugada R. Sudden death in structurally normal heart: we have learned a lot, but still a long way to go. *Eur Heart J* 2016;**37**:638–639.
  24. Schwartz PJ, Ackerman MJ. The long QT syndrome: a transatlantic clinical approach to diagnosis and therapy. *Eur Heart J* 2013;**34**:3109–3116.
  25. Templin C, Ghadri JR, Rougier JS, Baumer A, Kaplan V, Albesa M, Sticht H, Rauch A, Puleo C, Hu D, Barajas-Martinez H, Antzelevitch C, Lüscher TF, Abriel H, Duru F. Identification of a novel loss-of-function calcium channel gene mutation in short QT syndrome (SQTS6). *Eur Heart J* 2011;**32**:1077–1088.
  26. Anken L, Baumann S, Vigneault P, Biliczki P, Friedrich C, Xiao L, Girmatsion Z, Takac I, Brandes RP, Kissler S, Wiegratz I, Zumhagen S, Stallmeyer B, Hohnloser SH, Klingenhöben T, Schulze-Bahr E, Nattel S, Ehrlich JR. Oestradiol regulates human QT-interval: acceleration of cardiac repolarization by enhanced KCNH2 membrane trafficking. *Eur Heart J* 2016;**37**:640–650.
  27. Odening KE. Another jigsaw piece in the complex picture of hormonal regulation of cardiac repolarization. *Eur Heart J* 2016;**37**:651–653.
